# Supplementary material for: Resting-state cerebellar-cerebral networks are differently affected in first-episode, drug-naive schizophrenia patients and unaffected siblings
Source: PubMed Central journal article supplement (PMC4660304; doi:10.1038/srep17275), 2015-11-26
Supplement: srep17275-s1.pdf [file srep17275-s1.pdf]

Table S1. Cerebellar regions of the default-mode network with increased network homogeneity in the patients and the siblings

| Cluster location              | Peak (MNI) |     |     | Number of voxels | <i>T</i> value |
|-------------------------------|------------|-----|-----|------------------|----------------|
|                               | x          | y   | z   |                  |                |
| <i>Patients &gt; Controls</i> |            |     |     |                  |                |
| Right Crus II                 | 15         | -84 | -33 | 30               | 4.4486         |
| <i>Siblings &gt; Controls</i> |            |     |     |                  |                |
| Right Crus II                 | 9          | -57 | -24 | 12               | 3.7543         |

MNI = Montreal Neurological Institute

#### Figure Legends

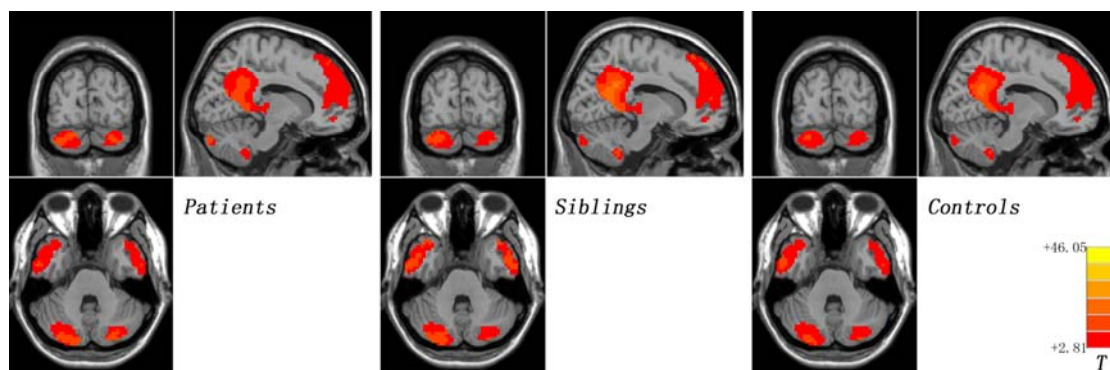

Figure S1. Brain regions having significant connectivity with the default-mode network seed in the patients/siblings/controls. Red denotes increased connectivity and the color bar indicates *T* values from voxel-based one-sample *t*-tests.

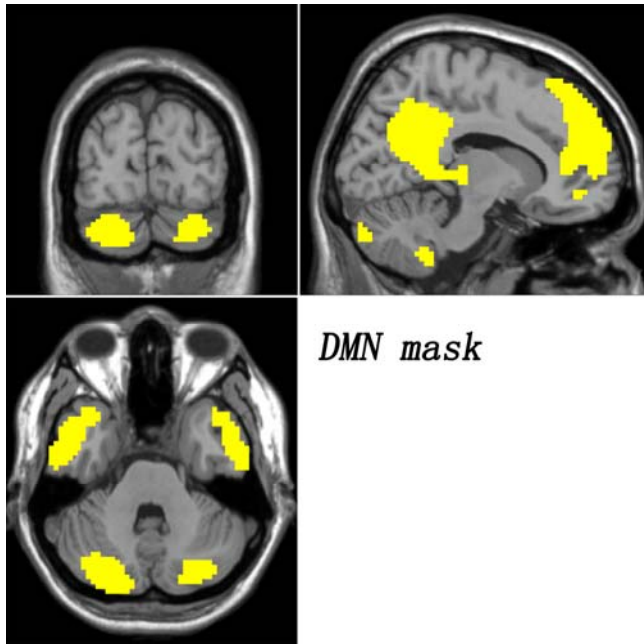

Figure S2. The default-mode network mask generated from the union of the results of one-sample  $t$ -tests from 3 groups.

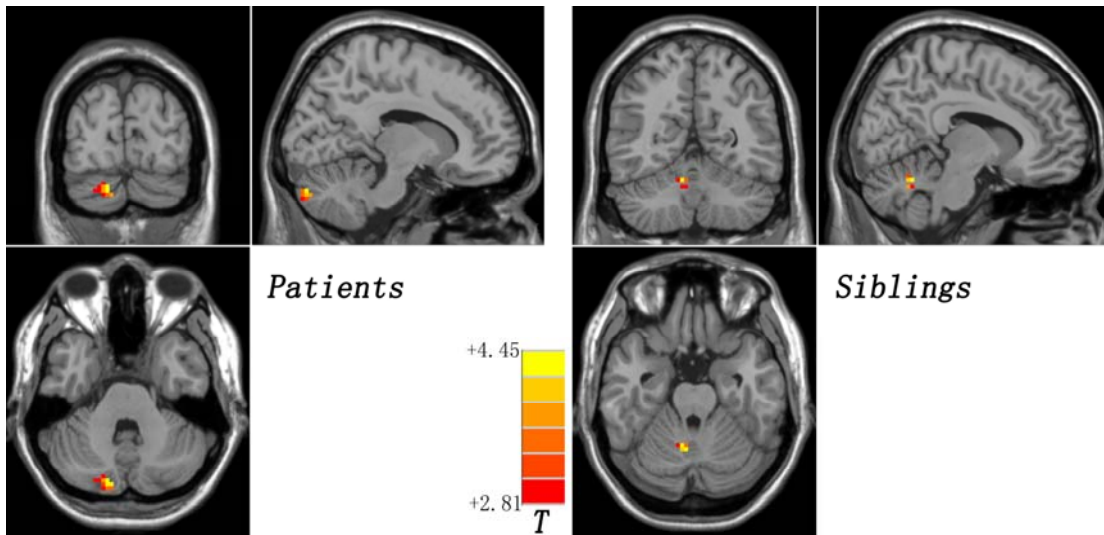

Figure S3. Increased network homogeneity in the right Crus II shared by the patients and the siblings. Red denotes increased connectivity in the patients/siblings relative to the controls and the color bar indicates  $T$  values from post hoc  $t$ -tests.
